# Supplementary material
Source: Springer Nature journal article supplement (https://www.springermedizin.de/resource/supplementary/13014_2013_945_MOESM5_ESM.pdf/9634486)

**A**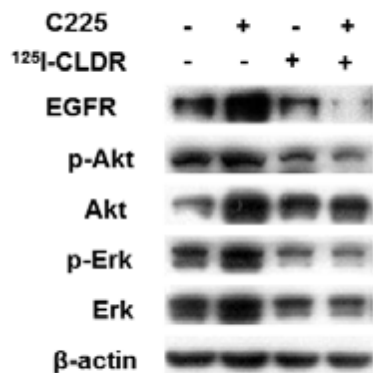**C**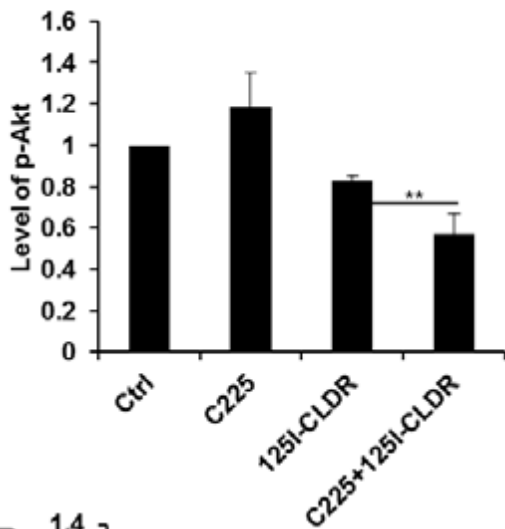**B**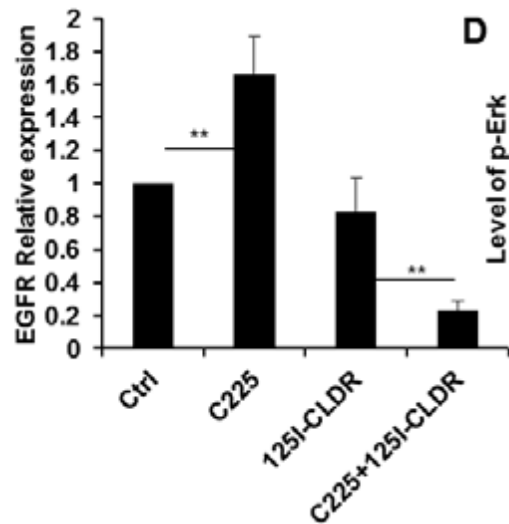**D**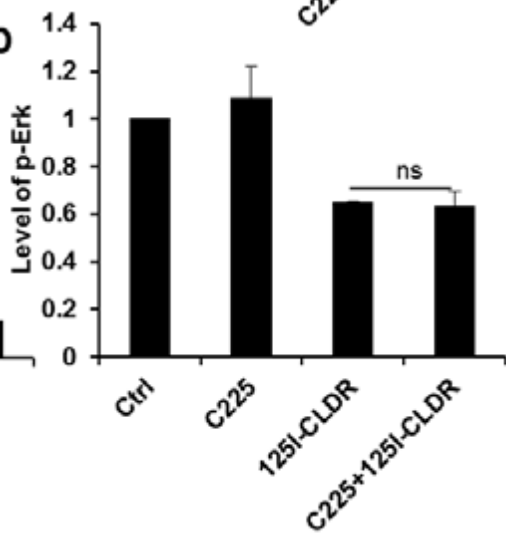

Supplement: MOESM5 [file 9634486]
